# Supplementary material for: Synthesis of a green magnetic biopolymer derived from oak fruit hull tannin for the efficient and simultaneous adsorption of a mixture of Malachite Green and Sunset Yellow dyes from aqueous solutions
Source: Royal Society of Chemistry journal article supplement (doi:10.1039/d2nj00994c), 2022-01-01
Supplement: d2nj00994c1.pdf [file d2nj00994c1.pdf]

## Electronic Supplementary Information

---

### **Synthesis of green magnetic biopolymer derived from *Oak fruit* hull tannin for efficient simultaneous adsorption of a mixture of Malachite Green and Sunset Yellow dyes from aqueous solutions**

Negar Sadegh <sup>a</sup>, Hedayat Haddadi <sup>\*a</sup>, Arash Asfaram <sup>†b</sup>

<sup>a</sup> *Department of Chemistry, Faculty of Sciences, Shahrekord University, P.O. Box 115, Shahrekord, Iran*

<sup>b</sup> *Medicinal Plants Research Center, Yasuj University of Medical Sciences, Yasuj, Iran*

---

---

\*Corresponding authors: E-mail address:  
[haddadi@sci.sku.ac.ir](mailto:haddadi@sci.sku.ac.ir) (H. Haddadi)  
[arash.asfaram@yums.ac.ir](mailto:arash.asfaram@yums.ac.ir) (A. Asfaram)

## Figures

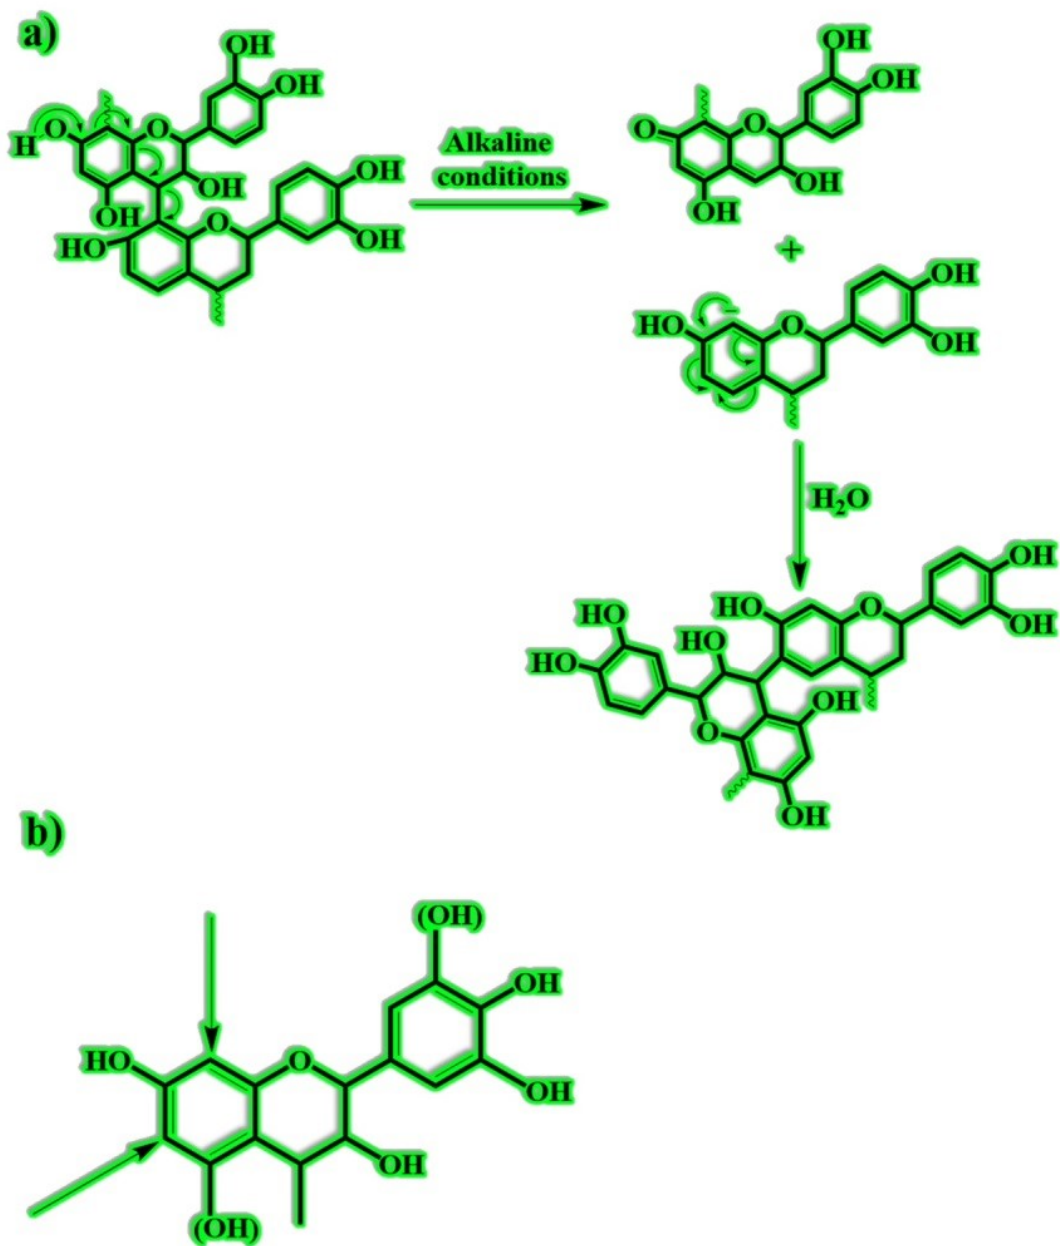

**Fig. S1.** Alkaline auto condensation (a) <sup>1</sup> and probable flavonoid unit in a condensed tannin (b). <sup>2</sup>

**(1) Hydroxy methylation:**

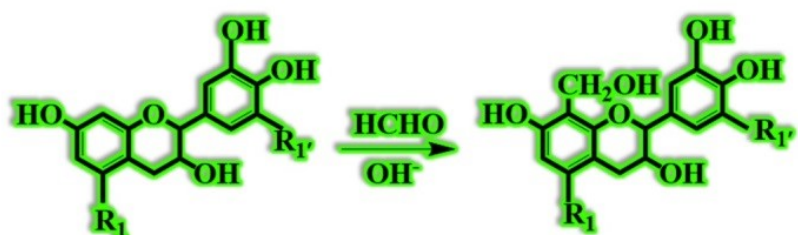

**(2) Methylene bridge immobilization:**

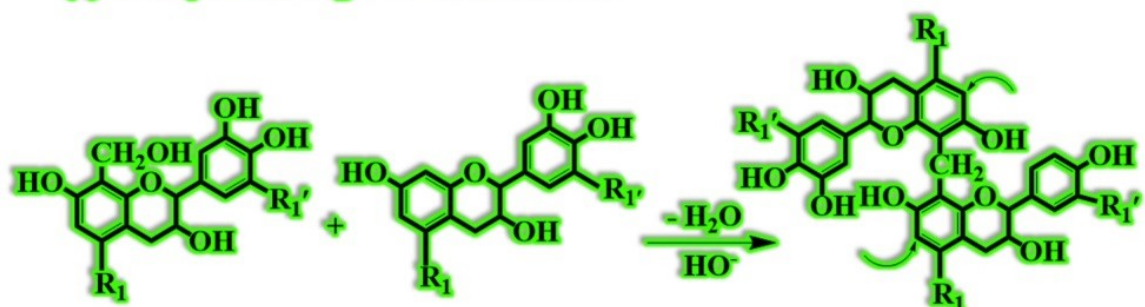

**(3) Methylene ether bridge immobilization:**

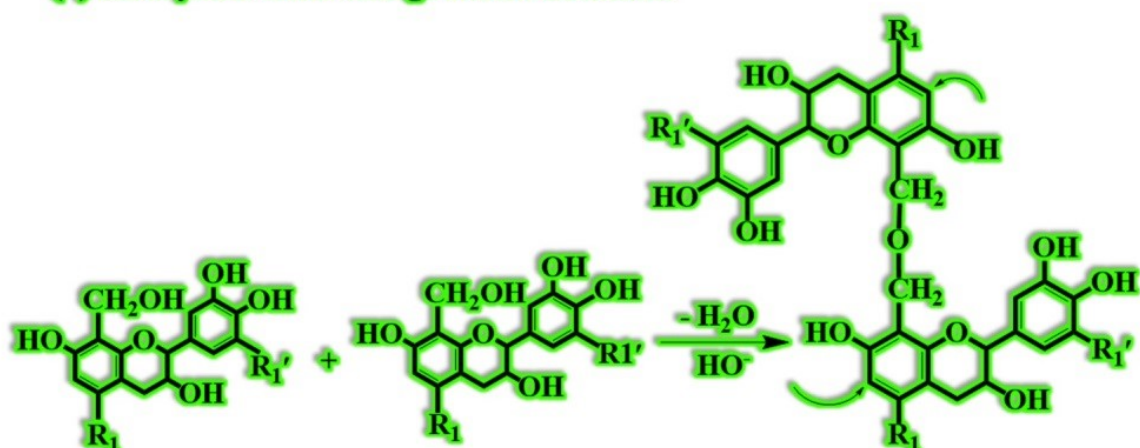

**Fig. S2.** Probable generic gelification mechanism between condensed tannin and formaldehyde.<sup>2,3</sup>

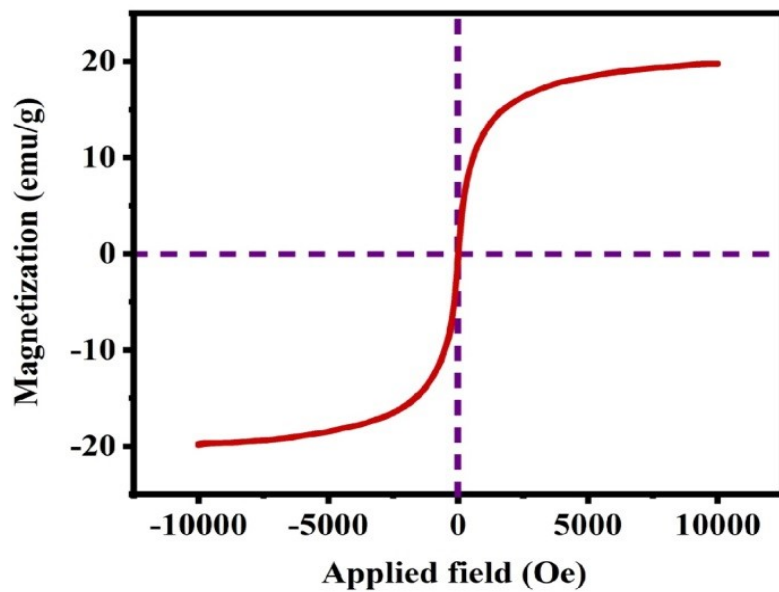

**Fig. S3.** Vibration sample magnetometry (VSM) data of  $\text{Fe}_3\text{O}_4\text{-OT}$  recorded at room temperature.

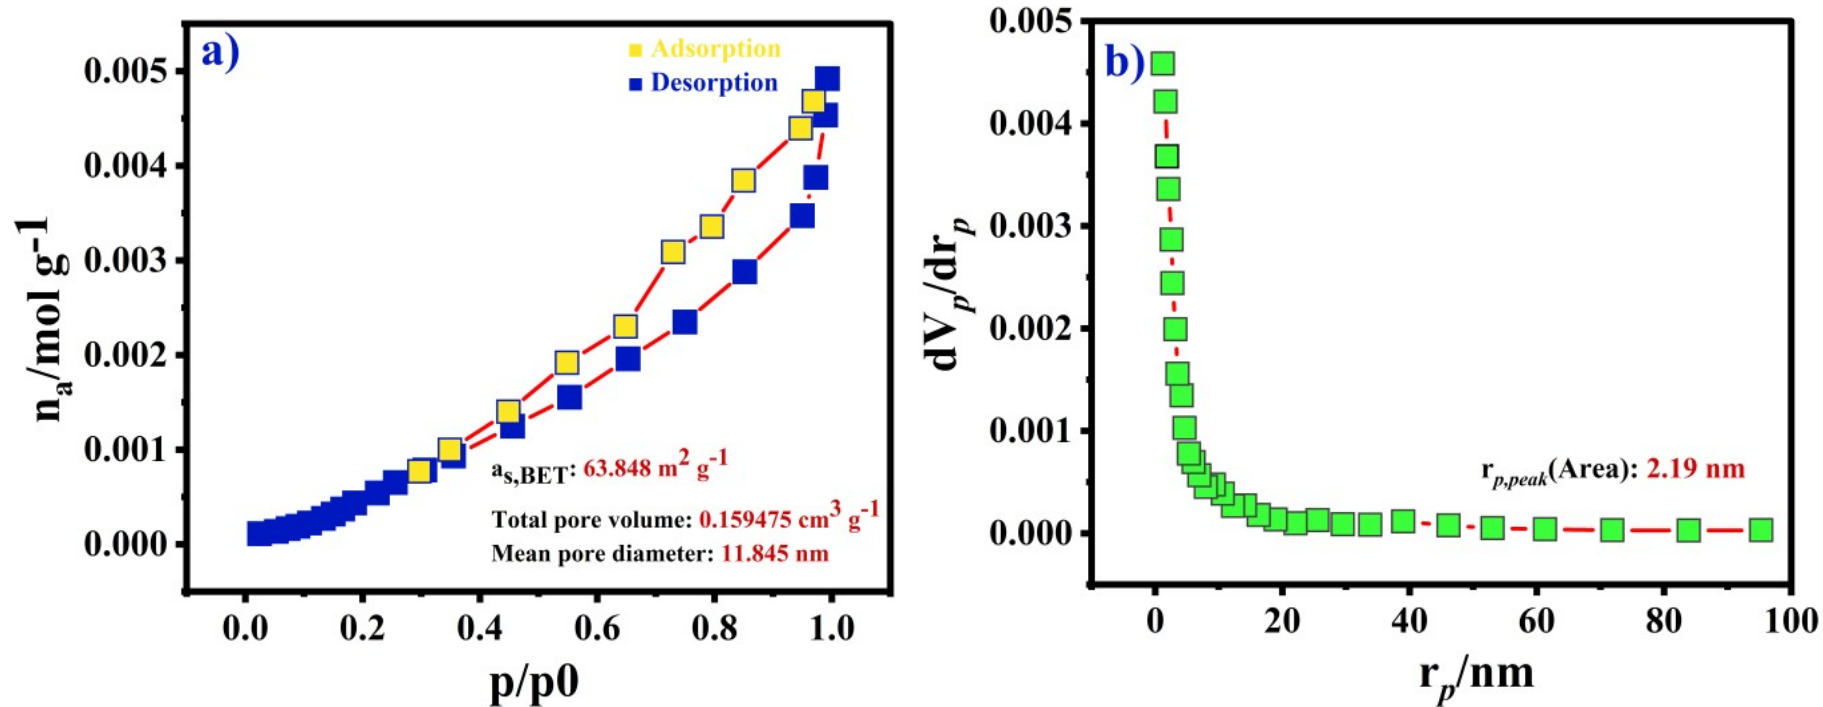

Fig. S4. Nitrogen adsorption and desorption diagram (a) and BJH diagram (b) for Fe<sub>3</sub>O<sub>4</sub>-OT adsorbent.

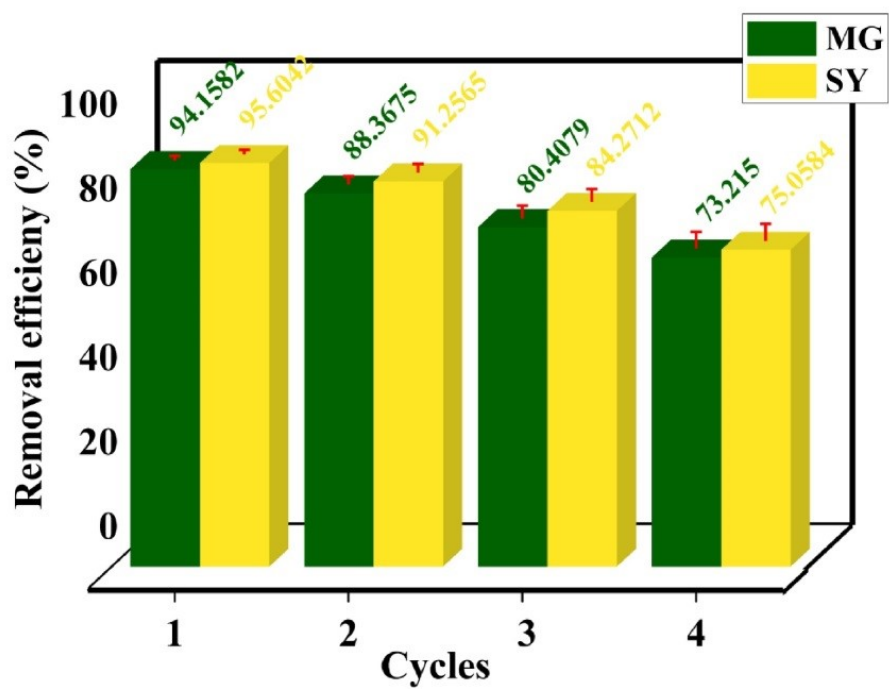

**Fig. S5.** The removal efficiency of MG and SY at 16 mg L<sup>-1</sup> initial concentration on Fe<sub>3</sub>O<sub>4</sub>-OT in different cycles.

## Tables

---

**Table S1.** Physical properties and molecular structure of MG and SY.

| <b>Name of the commercial dye</b>       | <b>Malachite Green (MG)</b>                    | <b>Sunset Yellow (SY)</b>                                                                    |
|-----------------------------------------|------------------------------------------------|----------------------------------------------------------------------------------------------|
| Colour Index Name                       | Aniline green                                  | Orange-yellow                                                                                |
| $\lambda_{\text{max}}$ (nm)             | 617                                            | 480                                                                                          |
| Molecular Weight (g mol <sup>-1</sup> ) | 364.911                                        | 452.400                                                                                      |
| Charge                                  | (+)                                            | (-)                                                                                          |
| Chemical Formula                        | C <sub>23</sub> H <sub>25</sub> N <sub>2</sub> | C <sub>16</sub> H <sub>10</sub> N <sub>2</sub> Na <sub>2</sub> O <sub>7</sub> S <sub>2</sub> |

**Table S2.** Assignment of groups in the FTIR spectrum of the Fe<sub>3</sub>O<sub>4</sub>-OT.

| <b>Band (cm<sup>-1</sup>)</b> | <b>Functional group</b>                                             |
|-------------------------------|---------------------------------------------------------------------|
| 3400                          | –OH stretching                                                      |
| 2900                          | C–H stretching vibrations in methylene (-CH <sub>2</sub> -)         |
| 2800                          | C–H stretching vibrations in methyl and methylene groups            |
| 1720                          | –C=O stretching vibrations                                          |
| 1627                          | C=C stretching in the aromatic ring                                 |
| 1450, 1500 and 1616           | C–C skeletal vibrations                                             |
| 1100 and 1380                 | C–O stretching vibrations                                           |
| 1205                          | C–O–C symmetric stretch                                             |
| 1035                          | C–O ethers stretching                                               |
| 620 to 823                    | C–H deformation vibrations in the aromatic ring                     |
| 455 and 764                   | =C–H bending vibrations                                             |
| 524                           | CCO and CCC ring deformation                                        |
| 578                           | Fe-O stretching vibrations of Fe <sup>2+</sup> and Fe <sup>3+</sup> |



**Table S3.** Variance analysis for response surface quadratic model for adsorption efficiency (%) of MG and SY onto Fe<sub>3</sub>O<sub>4</sub>-OT.

| Source of variation           | DF | R% MG          |                 |         |          | DF | R% SY          |                 |         |          |
|-------------------------------|----|----------------|-----------------|---------|----------|----|----------------|-----------------|---------|----------|
|                               |    | Sum of squares | Mean of squares | F-value | P-value  |    | Sum of squares | Mean of squares | F-value | P-value  |
| Model                         | 20 | 370.3          | 18.52           | 23.22   | < 0.0001 | 20 | 3321.8         | 221.5           | 41.79   | < 0.0001 |
| X <sub>1</sub>                | 1  | 0.442          | 0.442           | 0.554   | 0.4723   | 1  | 953.0          | 953             | 179.9   | < 0.0001 |
| X <sub>2</sub>                | 1  | 128.4          | 128.4           | 161.11  | < 0.0001 | 1  | 91.31          | 91.31           | 17.23   | 0.0022   |
| X <sub>3</sub>                | 1  | 16.21          | 16.21           | 20.33   | 0.0009   | 1  | 142.5          | 142.5           | 26.88   | 0.0004   |
| X <sub>4</sub>                | 1  | 30.46          | 30.46           | 38.21   | < 0.0001 | 1  | 235.4          | 235.4           | 44.42   | < 0.0001 |
| X <sub>5</sub>                | 1  | 4.00           | 4.00            | 5.02    | 0.0467   | 1  | 243.4          | 243.4           | 45.92   | < 0.0001 |
| X <sub>1</sub> X <sub>2</sub> | 1  | 15.79          | 15.79           | 19.81   | 0.0010   | 1  | 41.89          | 41.9            | 7.91    | 0.0211   |
| X <sub>1</sub> X <sub>3</sub> | 1  | 3.73           | 3.73            | 4.68    | 0.0535   | 1  | 190.9          | 190.9           | 36.02   | < 0.0001 |
| X <sub>1</sub> X <sub>4</sub> | 1  | 20.18          | 20.18           | 25.31   | 0.0004   | 1  | 20.14          | 20.14           | 3.80    | 0.0893   |
| X <sub>1</sub> X <sub>5</sub> | 1  | 7.50           | 7.50            | 9.41    | 0.0107   | 1  | 307.8          | 307.8           | 58.09   | < 0.0001 |
| X <sub>2</sub> X <sub>3</sub> | 1  | 0.505          | 0.505           | 0.633   | 0.4431   | 1  | 16.38          | 16.38           | 3.09    | 0.01211  |
| X <sub>2</sub> X <sub>4</sub> | 1  | 0.105          | 0.105           | 0.132   | 0.7231   | 1  | 275.8          | 275.8           | 52.04   | < 0.0001 |
| X <sub>2</sub> X <sub>5</sub> | 1  | 15.37          | 15.37           | 19.28   | 0.0011   | 1  | 119.5          | 119.5           | 22.56   | 0.0008   |
| X <sub>3</sub> X <sub>4</sub> | 1  | 0.393          | 0.393           | 0.493   | 0.4972   | 1  | 181.3          | 181.3           | 34.22   | 0.0002   |
| X <sub>3</sub> X <sub>5</sub> | 1  | 2.25           | 2.25            | 2.82    | 0.1214   | 1  | 381.0          | 381.0           | 71.90   | < 0.0001 |
| X <sub>4</sub> X <sub>5</sub> | 1  | 17.57          | 17.57           | 22.03   | 0.0007   | 1  | 121.6          | 121.6           | 22.95   | 0.0008   |
| X <sub>1</sub> <sup>2</sup>   | 1  | 1.67           | 1.67            | 2.09    | 0.1758   | 1  | 12.98          | 12.98           | 2.24    | 0.1629   |
| X <sub>2</sub> <sup>2</sup>   | 1  | 81.8           | 81.8            | 102.6   | < 0.0001 | 1  | 7.08           | 7.08            | 1.22    | 0.2928   |
| X <sub>3</sub> <sup>2</sup>   | 1  | 24.4           | 24.4            | 30.58   | 0.0002   | 1  | 0.245          | 0.245           | 0.042   | 0.8410   |
| X <sub>4</sub> <sup>2</sup>   | 1  | 4.34           | 4.34            | 5.44    | 0.0397   | 1  | 0.205          | 0.205           | 0.035   | 0.8545   |
| X <sub>5</sub> <sup>2</sup>   | 1  | 3.68           | 3.68            | 4.62    | 0.0547   | 1  | 1.34           | 1.34            | 0.231   | 0.6403   |
| Residual                      | 11 | 8.77           | 0.797           |         |          | 11 | 63.81          | 5.80            |         |          |
| Lack of Fit                   | 6  | 5.91           | 0.985           | 1.72    | 0.284    | 6  | 26.63          | 4.44            | 0.597   | 0.727    |
| Pure Error                    | 5  | 2.86           | 0.573           |         |          | 5  | 37.17          | 7.43            |         |          |
| Corr. Total                   | 31 | 379.1          |                 |         |          | 31 | 3406.6         |                 |         |          |

**Table S4.** Adsorption parameter of isotherm for the adsorption of MG and SY onto Fe<sub>3</sub>O<sub>4</sub>-OT (volume, 50 mL; adsorbent dose, 20 mg; contact time, 20 min; temperature, 25 °C; pH, 6.5).

| <b>Isotherm</b>                                                            | <b>Plot</b>                                          | <b>Parameters</b>                                       | <b>MG</b>            | <b>SY</b>            |
|----------------------------------------------------------------------------|------------------------------------------------------|---------------------------------------------------------|----------------------|----------------------|
| <b>Langmuir</b><br>$\frac{C_e}{q_e} = \frac{1}{Q_m k_L} + \frac{C_e}{Q_m}$ | <i>C<sub>e</sub>/q<sub>e</sub> vs. C<sub>e</sub></i> | Q <sub>m</sub> (mg g <sup>-1</sup> )                    | 49.00                | 53.96                |
|                                                                            |                                                      | K <sub>L</sub> (L mg <sup>-1</sup> )                    | 3.496                | 1.903                |
|                                                                            |                                                      | R <sup>2</sup>                                          | 0.997                | 0.993                |
|                                                                            |                                                      | R <sub>L</sub> =1/(1+(K <sub>L</sub> ×C <sub>0</sub> )) | 0.009-0.054          | 0.017-0.095          |
| <b>Freundlich</b><br>$\ln q_e = \ln K_F + \frac{1}{n} \ln C_e$             | <i>ln q<sub>e</sub> vs. ln C<sub>e</sub></i>         | 1/n                                                     | 0.162                | 0.311                |
|                                                                            |                                                      | K <sub>F</sub> (L mg <sup>-1</sup> )                    | 4.597                | 4.345                |
|                                                                            |                                                      | R <sup>2</sup>                                          | 0.967                | 0.929                |
| <b>Temkin</b><br>$q_e = B_1 \ln K_T + B_1 \ln C_e$                         | <i>q<sub>e</sub> vs. ln C<sub>e</sub></i>            | B <sub>1</sub>                                          | 4.240                | 8.903                |
|                                                                            |                                                      | K <sub>T</sub> (L mg <sup>-1</sup> )                    | 1.00                 | 1.00                 |
|                                                                            |                                                      | R <sup>2</sup>                                          | 0.892                | 0.968                |
| <b>Dubinin-Radushkevich</b><br>$\ln q_e = \ln Q_S - k\varepsilon^2$        | <i>ln q<sub>e</sub> vs. ε<sup>2</sup></i>            | Q <sub>s</sub> (mg g <sup>-1</sup> )                    | 38.88                | 44.36                |
|                                                                            |                                                      | β                                                       | -4.3E <sup>-09</sup> | -3.7E <sup>-08</sup> |
|                                                                            |                                                      | E (kJ mol <sup>-1</sup> )                               | 10.763               | 3.682                |
|                                                                            |                                                      | R <sup>2</sup>                                          | 0.785                | 0.930                |

**Table S5.** kinetic parameters for MG and SY dyes adsorption onto Fe<sub>3</sub>O<sub>4</sub>-OT (volume, 50 mL; initial concentration for each dye, 16 mg L<sup>-1</sup>; adsorbent dose, 20 mg; temperature, 25 °C; pH, 6.5).

| Model                                                                                        | Plot                      | Parameters                                           | MG    | SY    |
|----------------------------------------------------------------------------------------------|---------------------------|------------------------------------------------------|-------|-------|
| <b>First-order- kinetic</b><br>$\ln(q_e - q_t) = \ln q_e - k_1 t$                            | $\ln (q_e - q_t)$ vs. $t$ | $k_1$ (min <sup>-1</sup> )                           | 0.103 | 0.116 |
|                                                                                              |                           | $q_e$ (calc) (mg g <sup>-1</sup> )                   | 33.64 | 28.89 |
|                                                                                              |                           | R <sup>2</sup>                                       | 0.948 | 0.977 |
| <b>Pseudo-second-order- kinetic</b><br>$\frac{t}{q_t} = \frac{1}{k_2 q_e^2} + \frac{t}{q_e}$ | $t/q_t$ vs. $t$           | $k_2$ (min <sup>-1</sup> )                           | 0.002 | 0.004 |
|                                                                                              |                           | $q_e$ (calc) (mg g <sup>-1</sup> )                   | 48.51 | 45.44 |
|                                                                                              |                           | R <sup>2</sup>                                       | 0.991 | 0.996 |
|                                                                                              |                           | $h$ (mg g <sup>-1</sup> min <sup>-1</sup> )          | 6.503 | 9.734 |
| <b>Intraparticle diffusion</b><br>$q_t = k_{diff} t^{1/2} + C$                               | $q_t$ vs. $t^{1/2}$       | $K_{diff}$ (mg g <sup>-1</sup> min <sup>-1/2</sup> ) | 5.435 | 4.274 |
|                                                                                              |                           | $C$ (mg g <sup>-1</sup> )                            | 9.643 | 16.44 |
|                                                                                              |                           | R <sup>2</sup>                                       | 0.943 | 0.933 |
| <b>Elovich</b><br>$q_t = \frac{1}{\beta} \ln(t) + \frac{1}{\beta} \ln(\alpha\beta)$          | $q_t$ vs. $\ln t$         | $\beta$ (g mg <sup>-1</sup> )                        | 0.094 | 0.120 |
|                                                                                              |                           | $\alpha$ (mg g <sup>-1</sup> min <sup>-1</sup> )     | 14.37 | 32.69 |
|                                                                                              |                           | R <sup>2</sup>                                       | 0.971 | 0.966 |
| <b>Experimental data</b>                                                                     |                           | $q_e$ (exp) (mg g <sup>-1</sup> )                    | 39.21 | 39.53 |

**Table S6.** Thermodynamic parameters for the adsorption of MG and SY onto magnetic Fe<sub>3</sub>O<sub>4</sub>-OT (volume: 50 mL; initial dye concentration for each dye: 16 mg L<sup>-1</sup>; adsorbent dose: 20 mg; contact time: 20 min; pH: 6.5).

|                                           | MG             |                             | SY             |                             |
|-------------------------------------------|----------------|-----------------------------|----------------|-----------------------------|
| T(k)                                      | k <sub>C</sub> | ΔG°( kJ mol <sup>-1</sup> ) | k <sub>C</sub> | ΔG°( kJ mol <sup>-1</sup> ) |
| 288                                       | 6.98           | -4.65                       | 10.53          | -5.64                       |
| 298                                       | 15.24          | -6.75                       | 22.91          | -7.76                       |
| 308                                       | 16.88          | -7.24                       | 26.54          | -8.40                       |
| 318                                       | 36.78          | -9.53                       | 53.32          | -10.51                      |
| R <sup>2</sup>                            | 0.933          |                             | 0.948          |                             |
| ΔS°(j mol <sup>-1</sup> k <sup>-1</sup> ) | 151.0          |                             | 152.7          |                             |
| ΔH°(kj mol <sup>-1</sup> )                | 38.72          |                             | 38.19          |                             |

## References

1. A. Arbenz and L. Avérous, *Green Chem.* 2015, **17**, 2626-2646.
2. J. Beltrán-Heredia, P. Palo, J. Sánchez-Martín, J. R. Domínguez and T. González, *Ind. Eng. Chem. Res.*, 2012, **51**, 50-57.
3. J. Sánchez-Martín, J. Beltrán-Heredia and C. Carmona-Murillo, *Ind. Crops Prod.*, 2011, **33**, 409-417.
